# Supplementary material
Source: publisher site journal article supplement (https://www.dovepress.com/get_supplementary_file.php?f=475352.docx)
Supplement: Supplementary file 1 [file get_supplementary_file.php]

**Table S1.** **Baseline characteristics of males and females**

| **Variables** | **Sex** | | ***P* value** |
| --- | --- | --- | --- |
| **Males (*n* = 12271)** | **Females (*n* = 6891)** |
| Age (yr) | 48 (40-55) | 49 (40-56) | < 0.001 |
| HBP, *n* (%) | 2855 (23.27) | 1247 (18.10) | < 0.001 |
| DM, *n* (%) | 1269 (10.34) | 360 (5.22) | < 0.001 |
| Hyperlipidemia, *n* (%) | 6000 (48.90) | 1712 (24.84) | < 0.001 |
| ASCVD, *n* (%) | 193 (1.57) | 108 (1.57) | 0.998 |
| Smoking, *n* (%) | 4635 (37.77) | 106 (1.54) | < 0.001 |
| Drinking, *n* (%) | 5466 (44.54) | 516 (7.49) | < 0.001 |
| *H. pylori* infection, *n* (%) | 2340 (19.07) | 1261 (18.30) | 0.190 |
| **Medication history, n (%)** | | |  |
| Antihypertensive | 999 (8.14) | 499 (7.24) | 0.027 |
| Antidiabetic | 346 (2.82) | 170 (2.47) | 0.150 |
| Statins | 529 (4.31) | 276 (4.01) | 0.329 |
| Antiplatelet | 196 (1.60) | 109 (1.58) | 0.950 |
| PPIs/H2 blocker | 260 (2.12) | 120 (1.74) | 0.076 |
| **Metabolic index** | |  |  |
| BMI (kg/m2) | 25.17 (23.18-27.20) | 22.86 (21.00-24.84) | < 0.001 |
| WC (cm) | 88 (82-94) | 77 (71-83) | < 0.001 |
| SBP (mmHg) | 124 (115-134) | 118 (107-132) | < 0.001 |
| DBP (mmHg) | 78 (71-86) | 71 (64-80) | < 0.001 |
| TC (mmol/L) | 5.05 (4.45-5.69) | 5.01 (4.40-5.66) | 0.017 |
| TG (mmol/L) | 1.73 (1.16-2.71) | 1.16 (0.82-1.69) | < 0.001 |
| HDLC (mmol/L) | 1.19 (1.05-1.35) | 1.43 (1.26-1.63) | < 0.001 |
| LDLC (mmol/L) | 2.83 (2.29-3.36) | 2.89 (2.39-3.44) | < 0.001 |
| FBG (mmol/L) | 5.41 (5.03-5.94) | 5.27 (4.93-5.66) | < 0.001 |
| HbA1c (%) | 5.60 (5.40-5.90) | 5.50 (5.30-5.80) | < 0.001 |
| Cr (µmol/L) | 81.00 (74.00-89.00) | 59.00 (54.00-66.00) | < 0.001 |
| **Gastric biomarkers** | | |  |
| Gastrin-17 (pmol/L) | 1.68 (0.81-3.58) | 1.61 (0.74-3.44) | < 0.001 |
| PGI (ng/mL) | 86.80 (66.18-116.53) | 73.56 (54.49-96.91) | < 0.001 |
| PGII (ng/mL) | 7.75 (5.36-11.62) | 6.74 (4.42-10.56) | < 0.001 |
| PGI/II | 11.08 (8.18-15.16) | 10.68 (7.63-14.92) | < 0.001 |

Values were given as median (interquartile range)

MetS: Metabolic syndrome; HBP: Hypertension; DM: Diabetes mellitus; ASCVD: Atherosclerotic cardiovascular diseases; *H. pylori*: *Helicobacter pylori*; PPIs: Proton pump inhibitors; H2: Histamine 2; BMI: Body mass index; WC: Waist circumference; SBP: Systolic blood pressure; DBP: Diastolic blood pressure; TC: Total cholesterol; TG: Triglycerides; HDLC: High-density lipoprotein cholesterol; LDLC: Low-density lipoprotein cholesterol; FBG: Fasting blood glucose; HbA1c: Glycosylated hemoglobin; Cr: Creatinine; PGI: Pepsinogen I; PGII: Pepsinogen II.

**Table S2 Baseline characteristics of participants with or without metabolic syndrome in males and females**

| **Variables** | **Males (*n* = 12271)** | | ***P* value** | **Females (n=6891)** | | ***P* value** |
| --- | --- | --- | --- | --- | --- | --- |
| **MetS-negative**  **(*n* = 7955)** | **MetS-positive**  **(*n* = 4316)** | **MetS-negative**  **(*n* = 5195)** | **MetS-positive**  **(*n* = 1696)** |
| Age (yr) | 47 (38-55) | 49 (42-55) | < 0.001 | 47 (37-54) | 55 (50-61) | < 0.001 |
| HBP, *n* (%) | 1090 (13.70) | 1765 (40.89) | < 0.001 | 486 (9.36) | 761 (44.87) | < 0.001 |
| DM, *n* (%) | 357 (4.49) | 912 (21.13) | < 0.001 | 77 (1.48) | 283 (16.69) | < 0.001 |
| Hyperlipidemia, *n* (%) | 2609 (32.80) | 3391 (78.57) | < 0.001 | 797 (15.34) | 915 (53.95) | < 0.001 |
| ASCVD, *n* (%) | 103 (1.29) | 90 (2.09) | 0.001 | 62 (1.19) | 46 (2.71) | < 0.001 |
| Smoking, *n* (%) | 2885 (36.27) | 1750 (40.55) | < 0.001 | 78 (1.50) | 28 (1.65) | 0.664 |
| Drinking, *n* (%) | 3387 (42.58) | 2079 (48.17) | < 0.001 | 423 (8.14) | 93 (5.48) | < 0.001 |
| *H. pylori* infection, *n* (%) | 1455 (18.29) | 885 (20.51) | 0.003 | 911 (17.54) | 350 (20.64) | 0.004 |
| **Medication history** | | |  |  |  |  |
| Antihypertensive | 632 (7.94) | 367 (8.50) | 0.284 | 358 (6.89) | 141 (8.31) | 0.052 |
| Antidiabetic | 201 (2.53) | 145 (3.36) | 0.008 | 116 (2.23) | 54 (3.18) | 0.031 |
| Statins | 289 (3.63) | 240 (5.56) | < 0.001 | 184 (3.54) | 92 (5.42) | 0.001 |
| Antiplatelet | 103 (1.29) | 93 (2.15) | < 0.001 | 62 (1.19) | 47 (2.77) | < 0.001 |
| PPIs/H2 blocker | 147 (1.85) | 113 (2.62) | 0.005 | 79 (1.52) | 41 (2.42) | 0.018 |
| **Metabolic Index** | |  |  |  |  |  |
| BMI (kg/m2) | 24.15 (22.41-25.94) | 27.08 (25.43-28.76) | < 0.001 | 22.10 (20.52-23.82) | 25.29 (23.71-27.21) | < 0.001 |
| WC (cm) | 85 (80-89) | 94 (90-98) | < 0.001 | 74 (70-79) | 84 (81-90) | < 0.001 |
| SBP (mmHg) | 121 (113-129) | 132 (123-140) | < 0.001 | 114 (105-125) | 135 (124-146) | < 0.001 |
| DBP (mmHg) | 75 (68-82) | 84 (77-90) | < 0.001 | 69 (63-76) | 80 (72-87) | < 0.001 |
| TC (mmol/L) | 4.96  (4.39-5.57) | 5.21  (4.59-5.90) | < 0.001 | 4.93  (4.34-5.56) | 5.26  (4.60-5.97) | < 0.001 |
| TG (mmol/L) | 1.38 (1.00-1.98) | 2.64 (1.92-3.92) | < 0.001 | 1.00 (0.74-1.36) | 2.01 (1.50-2.69) | < 0.001 |
| HDLC (mmol/L) | 1.24 (1.11-1.40) | 1.07 (0.96-1.23) | < 0.001 | 1.49 (1.33-1.68) | 1.24 (1.11-1.39) | < 0.001 |
| LDLC (mmol/L) | 2.89 (2.39-3.40) | 2.69 (2.06-3.27) | < 0.001 | 2.87 (2.39-3.40) | 2.96 (2.39-3.56) | 0.003 |
| FBG (mmol/L) | 5.24 (4.92-5.56) | 5.91 (5.44-6.66) | < 0.001 | 5.15 (4.87-5.44) | 5.81 (5.38-6.36) | < 0.001 |
| HbA1c (%) | 5.50 (5.30-5.70) | 5.80 (5.50-6.30) | < 0.001 | 5.50 (5.30-5.70) | 5.80 (5.50-6.20) | < 0.001 |
| Cr (µmol/L) | 81.00 (74.00-89.00) | 81.00 (73.00-89.00) | 0.011 | 59.00 (54.00-65.00) | 60.00 (54.00-67.00) | < 0.001 |
| **Gastric biomarkers** | | |  |  |  |  |
| Gastrin-17 (pmol/L) | 1.61 (0.72-3.41) | 1.81 (0.96-3.95) | < 0.001 | 1.56 (0.70-3.19) | 1.77 (0.88-4.24) | < 0.001 |
| PGI (ng/mL) | 88.18 (68.12-117.52) | 83.76 (63.32-114.44) | < 0.001 | 72.82 (54.18-95.14) | 75.88 (55.84-102.38) | < 0.001 |
| PGII (ng/mL) | 7.93 (5.47-11.83) | 7.46 (5.17-11.21) | < 0.001 | 6.59 (4.34-10.14) | 7.31 (4.74-12.18) | < 0.001 |
| PGI/II | 10.99 (8.14-15.01) | 11.24 (8.25-15.46) | 0.029 | 10.86 (7.75-15.08) | 10.11 (7.28-14.41) | < 0.001 |

Values were given as median (interquartile range)

MetS: Metabolic syndrome; HBP: Hypertension; DM: Diabetes mellitus; ASCVD: Atherosclerotic cardiovascular diseases; *H. pylori*: *Helicobacter pylori*; PPI: Proton pump inhibitor; H2: Histamine2; BMI: Body mass index; WC: Waist circumference; SBP: Systolic blood pressure; DBP: Diastolic blood pressure; TC: Total cholesterol; TG: Triglycerides; HDLC: High-density lipoprotein cholesterol; LDLC: Low-density lipoprotein cholesterol; FBG: Fasting blood glucose; HbA1c: Glycosylated hemoglobin; Cr: Creatinine; PGI: Pepsinogen I; PGII: Pepsinogen II.

**Table S3. Results of multicollinearity analysis**

| Covariates | All participants | | Males | | Females | |
| --- | --- | --- | --- | --- | --- | --- |
| Tolerance | VIF | Tolerance | VIF | Tolerance | VIF |
| Age | 0.812 | 1.231 | 0.860 | 1.163 | 0.596 | 1.679 |
| BMI | 0.242 | 4.138 | 0.226 | 4.420 | 0.276 | 3.629 |
| WC | 0.216 | 4.632 | 0.225 | 4.450 | 0.247 | 4.054 |
| SBP | 0.325 | 3.072 | 0.339 | 2.954 | 0.294 | 3.400 |
| DBP | 0.336 | 2.975 | 0.343 | 2.916 | 0.350 | 2.861 |
| **TC** | **0.072** | **13.901** | **0.090** | **11.133** | **0.034** | **29.520** |
| TG | 0.124 | 8.036 | 0.127 | 7.861 | 0.139 | 7.202 |
| HDLC | 0.372 | 2.690 | 0.463 | 2.160 | 0.262 | 3.813 |
| **LDLC** | **0.098** | **10.179** | 0.125 | 8.024 | **0.046** | **21.756** |
| FBG | 0.359 | 2.787 | 0.347 | 2.879 | 0.405 | 2.466 |
| HBA1C | 0.377 | 2.652 | 0.363 | 2.752 | 0.427 | 2.343 |
| Cr | 0.812 | 1.231 | 0.980 | 1.020 | 0.953 | 1.050 |

VIF: variance inflation factor; BMI: body mass index; WC: waist circumference; SBP: systolic blood pressure; DBP: diastolic blood pressure; TC: total cholesterol; TG: triglycerides; HDLC: high-density lipoprotein cholesterol; LDLC: low-density lipoprotein cholesterol; FBG: fasting blood glucose; HbA1c: glycosylated hemoglobin; Cr: creatinine.

Bold values were excluded from the analysis due to multicollinearity.

**Table S4.** Gastric biomarkers and the components of MetS.

|  | **WC** | | **SBP/DBP** | | **FBG** | | **HDLC** | | **TG** | |
| --- | --- | --- | --- | --- | --- | --- | --- | --- | --- | --- |
|  | **No** | **Yes** | **No** | **Yes** | **No** | **Yes** | **No** | **Yes** | **No** | **Yes** |
|  | n=8406 | n=10756 | n=11166 | n=7996 | n=14631 | n=4531 | n=11914 | n=7248 | n=12852 | n=6310 |
| Gastrin-17 (pmol/L) | 1.59  (0.72-3.33) | *1.70  (0.83-3.70) | 1.60  (0.73-3.38) | *1.73  (0.86-3.80) | 1.64  (0.76-3.49) | *1.68  (0.86-3.63) | 1.61  (0.74-3.42) | *1.72  (0.85-3.78) | 1.59  (0.74-3.29) | *1.78  (0.85-4.02) |
| PGI (ng/mL) | 81.28  (60.22-109.32) | *82.17  (61.57-110.58) | 80.70  (59.93-109.28) | *82.97  (62.42-111.30) | 82.68  (62.16-111.38) | *78.24  (57.72-105.94) | 80.54  (59.98-107.19) | *83.60  (62.91-114.67) | 81.09  (60.63-108.65) | *83.09  (61.96-112.70) |
| PGII (ng/mL) | 7.34  (4.92-11.39) | 7.44  (5.06-11.22) | 7.35  (4.93-11.39) | 7.46  (5.09-11.18) | 7.51  (5.13-11.40) | *7.02  (4.59-11.00) | 7.17  (4.80-10.93) | *7.80  (5.35-12.00) | 7.28  (4.88-11.11) | *7.63  (5.25-11.79) |
| PGI/PGII | 10.92  (7.91-14.99) | 10.97  (8.02-15.15) | 10.80  (7.88-14.92) | *11.11  (8.10-15.26) | 10.93  (8.01-14.92) | 11.01  (7.86-15.75) | 11.07  (8.03-15.25) | *10.74  (7.90-14.77) | 11.03  (8.04-15.13) | *10.74  (7.85-14.90) |

Values were given as median (interquartile range)

Abbreviations: MetS: metabolic syndrome; HBP: hypertension; WC: waist circumference; SBP: systolic blood pressure; DBP: diastolic blood pressure; TG: triglycerides; HDLC: high-density lipoprotein cholesterol; FBG: fasting blood glucose; PGI: pepsinogen I; PGII: pepsinogen II.

* Indicate statistically significant differences from the “No” group. (**p* < 0.05).

**Table S5.** **Baseline characteristics of participants with stable MetS-negative and Transition to MetS-positive.**

|  | **All participants** | | | **Males** | | | **Females** | | |
| --- | --- | --- | --- | --- | --- | --- | --- | --- | --- |
| Variable | Stable MetS-negative（n= 833) | Transition to MetS-positive (n=199) | ***P* value** | Stable MetS-negative（n= 619) | Transition to MetS-positive (n=166) | ***P* value** | Stable MetS-negative（n= 214) | Transition to MetS-positive (n=33) | ***P* value** |
| Age (yr) | 46 (39, 52) | 47 (40, 53) | 0.050 | 46 (39, 52) | 46 (40, 53) | 0.500 | 45 (37, 53) | 53 (44, 56) | 0.003 |
| Sex (male), *n* (%) | 619 (74%) | 166 (83%) | 0.010 |  |  |  |  |  |  |
| HBP, *n* (%) | 79 (13%) | 35 (23%) | <0.001 | 61 (13%) | 26 (20%) | 0.049 | 18 (12%) | 9 (41%) | 0.002 |
| DM, *n* (%) | 22 (3.6%) | 5 (3.3%) | 0.900 | 21 (4.5%) | 4 (3.1%) | 0.500 | 1 (0.7%) | 1 (4.5%) | 0.200 |
| Hyperlipidemia, *n* (%) | 163 (27%) | 54 (36%) | 0.030 | 141 (31%) | 51 (40%) | 0.053 | 22 (15%) | 3 (14%) | >0.9 |
| ASCVD, *n* (%) | 10 (1.2%) | 4 (2.0%) | 0.300 | 8 (1.3%) | 3 (1.8%) | 0.700 | 2 (0.9%) | 1 (3.0%) | 0.400 |
| Smoking, *n* (%) | 140 (23%) | 49 (32%) | 0.020 | 137 (30%) | 49 (38%) | 0.072 | 3 (2.0%) | 0 (0%) | >0.9 |
| Drinking, *n* (%) | 240 (39%) | 68 (45%) | 0.200 | 221 (48%) | 67 (52%) | 0.400 | 19 (13%) | 1 (4.5%) | 0.500 |
| *H. pylori* infection, *n* (%) | 107 (18%) | 30 (20%) | 0.500 | 82 (18%) | 27 (21%) | 0.400 | 25 (17%) | 3 (14%) | >0.9 |
| **Medication history, n (%)** | | | | | | | | | |
| Antihypertensive | 67 (8.0%) | 14 (7.0%) | 0.770 | 54 (8.7%) | 10 (6.0%) | 0.300 | 13 (6.1%) | 4 (12%) | 0.300 |
| Antidiabetic | 21 (2.5%) | 4 (2.0%) | 0.800 | 21 (3.4%) | 3 (1.8%) | 0.300 | 0 (0%) | 1 (3.0%) | 0.130 |
| Statins | 16 (1.9%) | 6 (3.0%) | 0.400 | 14 (2.3%) | 5 (3.0%) | 0.600 | 2 (0.9%) | 1 (3.0%) | 0.40 |
| Antiplatelet | 7 (0.8%) | 4 (2.0%) | 0.200 | 6 (1.0%) | 3 (1.8%) | 0.400 | 1 (0.5%) | 1 (3.0%) | 0.20 |
| PPI/H2 blocker | 11 (1.3%) | 3 (1.5%) | 0.700 | 10 (1.6%) | 2 (1.2%) | >0.9 | 1 (0.5%) | 1 (3.0%) | 0.20 |
| **Metabolic index** | | | | | | | | | |
| BMI (kg/m2) | 23.55 (21.73, 25.32) | 25.60 (24.13, 27.42) | <0.001 | 24.07 (22.40, 25.68) | 25.84 (24.41, 27.60) | <0.001 | 21.95 (20.74, 23.48) | 24.20 (22.75, 25.81) | <0.001 |
| WC (cm) | 83 (76, 88) | 88 (83, 94) | <0.001 | 85 (80, 89) | 89 (85, 94) | <0.001 | 73 (69, 78) | 79 (75, 86) | <0.001 |
| SBP (mmHg) | 118 (108, 126) | 123 (116, 131) | <0.001 | 120 (111, 127) | 123 (117, 130) | <0.001 | 112 (103, 123) | 129 (112, 138) | <0.001 |
| DBP (mmHg) | 73 (67, 81) | 78 (71, 84) | <0.001 | 74 (68, 81) | 78 (72, 84) | <0.001 | 68 (62, 75) | 75 (68, 81) | <0.001 |
| TC (mmol/L) | 4.92 (4.38, 5.54) | 5.14 (4.52, 5.64) | 0.040 | 4.88 (4.37, 5.53) | 5.16 (4.52, 5.63) | 0.026 | 5.14 (4.86, 5.38) | 5.22 (4.85, 5.42) | 0.500 |
| TG (mmol/L) | 1.21 (0.89, 1.64) | 1.66 (1.29, 2.45) | <0.001 | 1.31 (0.99, 1.84) | 1.77 (1.36, 2.67) | <0.001 | 1.56 (1.38, 1.74) | 1.33 (1.28, 1.45) | <0.001 |
| HDLC (mmol/L) | 1.32 (1.18, 1.52) | 1.21 (1.09, 1.33) | <0.001 | 1.26 (1.14, 1.41) | 1.19 (1.09, 1.30) | <0.001 | 2.90 (2.51, 3.35) | 3.16 (2.58, 3.54) | 0.200 |
| LDLC (mmol/L) | 2.91 (2.44, 3.36) | 2.90 (2.26, 3.44) | >0.9 | 2.91 (2.42, 3.37) | 2.88 (2.22, 3.42) | 0.600 | 5.40 (5.20, 5.70) | 5.55 (5.27, 5.90) | 0.077 |
| FBG (mmol/L) | 5.15 (4.89, 5.47) | 5.34 (4.99, 5.56) | <0.001 | 5.15 (4.89, 5.52) | 5.35 (5.04, 5.58) | <0.001 | 1.77 (1.16, 3.27) | 1.96 (1.07, 4.28) | 0.500 |
| HbA1c (%) | 5.40 (5.20, 5.70) | 5.50 (5.30, 5.80) | 0.010 | 5.50 (5.30, 5.70) | 5.50 (5.30, 5.80) | 0.042 | 11.10 (9.80, 12.30) | 10.60 (10.20, 11.30) | 0.700 |
| Cr (µmol/L) | 77 (66, 86) | 80 (70, 87) | 0.010 | 81 (74, 89) | 82 (75, 90) | 0.400 | 72 (54, 91) | 80 (64, 93) | 0.200 |
| **Gastric biomarkers** |  |  |  |  |  |  |  |  |  |
| Gastrin-17 (pmol/L) | 1.80 (1.22, 3.35) | 2.83 (1.49, 5.64) | <0.001 | 1.82 (1.26, 3.41) | 2.96 (1.54, 5.81) | <0.001 | 6.8 (5.1, 9.1) | 6.7 (4.7, 9.6) | >0.9 |
| PGI (ng/mL) | 13.20 (11.70, 15.00) | 13.45 (11.88, 15.03) | 0.500 | 13.50 (12.20, 15.25) | 13.70 (12.20, 15.20) | 0.800 | 18 (12%) | 9 (41%) | 0.002 |
| PGII (ng/mL) | 82 (63, 110) | 83 (67, 109) | 0.400 | 84 (67, 117) | 83 (69, 112) | 0.800 | 1 (0.7%) | 1 (4.5%) | 0.200 |
| PGI/II | 7.3 (5.6, 10.0) | 7.4 (5.7, 11.5) | 0.400 | 7.7 (5.8, 10.3) | 7.5 (5.8, 11.5) | 0.500 | 22 (15%) | 3 (14%) | >0.9 |

**
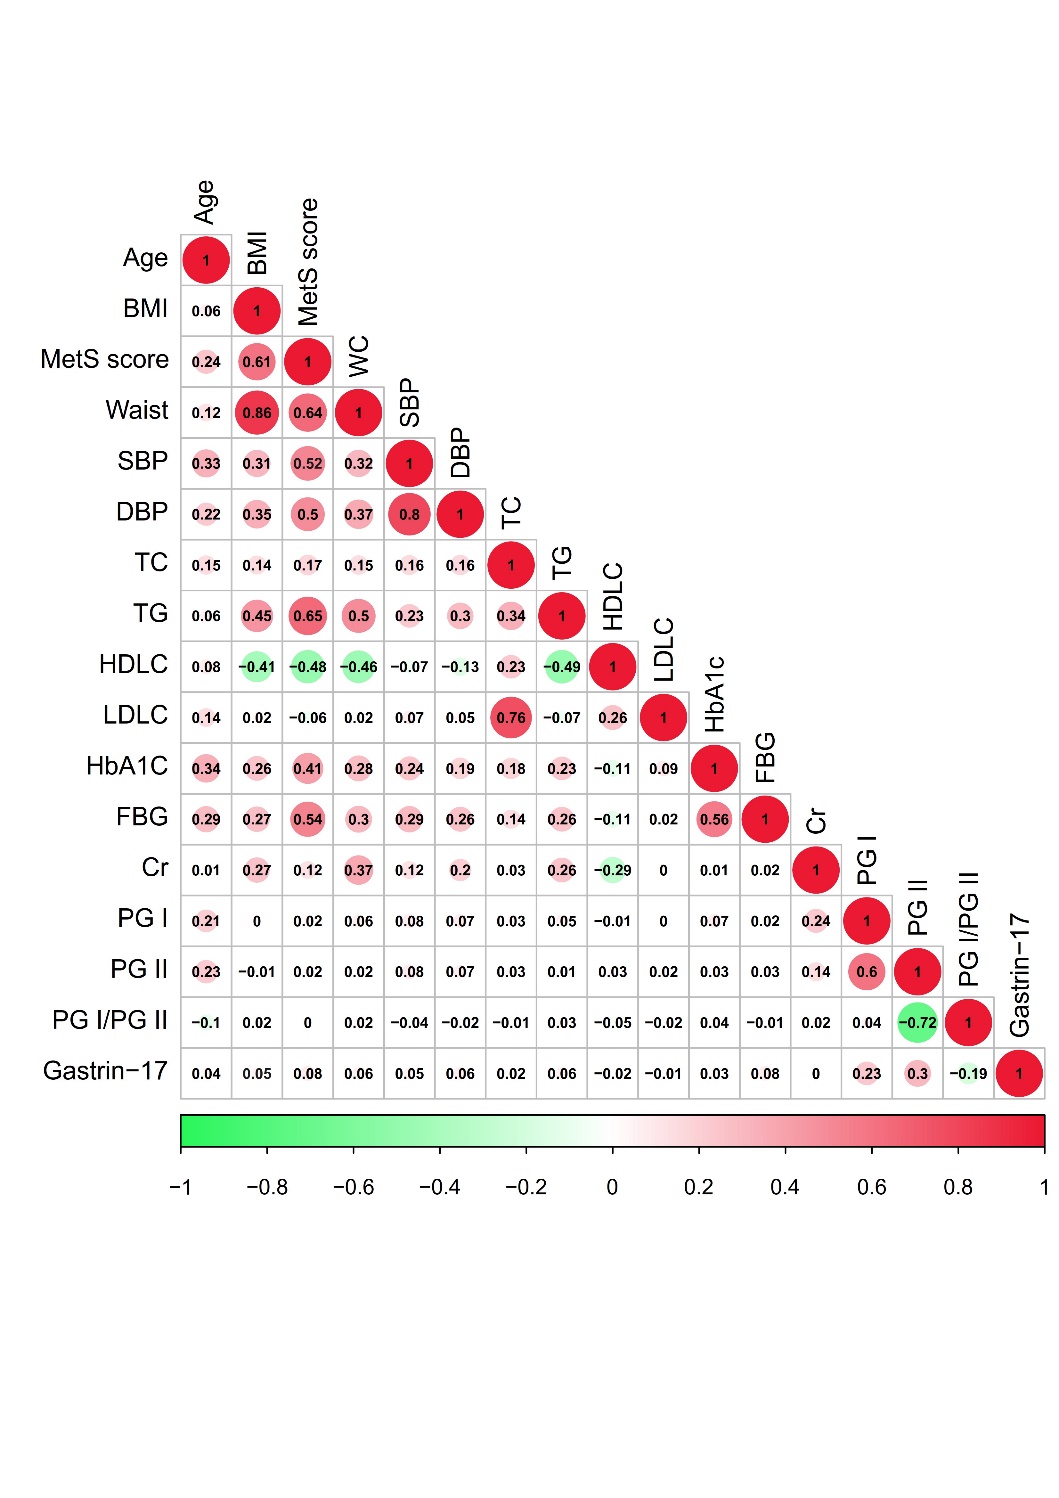
**

**Figure S1. Spearman correlation matrix of gastric biomarkers and clinical variables.**

Colors red and green represent positive and negative correlations, respectively. BMI: Body mass index; MetS: Metabolic syndrome; SBP: Systolic blood pressure; DBP: Diastolic blood pressure; TC: Total cholesterol; TG: Triglycerides; HDLC: High-density lipoprotein cholesterol; LDLC: Low-density lipoprotein cholesterol; FBG: Fasting blood glucose; HbA1c: Glycosylated hemoglobin; Cr: Creatinine; PGI: Pepsinogen I; PGII: Pepsinogen II.
